# Supplementary material
Source: MDPI journal article supplement (https://www.mdpi.com/2079-8954/10/5/133)
Supplement: s1 [file s1]

## Supplementary Materials

**Table S1: Systematic Map**

| No. | Study                        | L1/L2                 | Proficiency Level | Theoretical Framework             | Methodology               | Measures                                              | Input Medium          | Input Mode                                                                                                           | Assessed Vocabulary Knowledge                    |
|-----|------------------------------|-----------------------|-------------------|-----------------------------------|---------------------------|-------------------------------------------------------|-----------------------|----------------------------------------------------------------------------------------------------------------------|--------------------------------------------------|
| 1   | Neuman and Koskinen (1992)   | Not Reported /English | Mixed             | Input Hypothesis (Krashen, 1985)  | Quantitative experimental | Researcher-designed test; Pretest; Immediate posttest | Children's television | Intralingual Caption                                                                                                 | Receptive Form; Receptive Meaning; Receptive Use |
| 2   | Danan (1992)                 | Not Reported /English | Not Reported      | Dual Coding Theory (Paivio, 1971) | Quantitative experimental | Researcher-designed test; Immediate posttest          | Instructional Video   | Interlingual Standard Subtitle; Interlingual Reversed Subtitle Intralingual Subtitle; Interlingual Reversed Subtitle | Productive Meaning                               |
| 3   | Koolstra and Beentjes (1999) | Dutch /English        | Mixed             | Input Hypothesis (Krashen, 1985)  | Quantitative experimental | Researcher-designed test; Pretest; Immediate posttest | Documentary           | Interlingual Standard Subtitle                                                                                       | Receptive Form; Receptive Meaning                |
| 4   | Linebarger (2001)            | Not Reported /English | A (Beginner)      | Not Reported                      | Quantitative experimental | Researcher-designed test; Pretest; Immediate posttest | Children's television | Intralingual Caption                                                                                                 | Receptive Form                                   |

| No. | Study                      | L1/L2                        | Proficiency Level | Theoretical Framework                                               | Methodology               | Measures                                              | Input Medium        | Input Mode                                   | Assessed Vocabulary Knowledge |
|-----|----------------------------|------------------------------|-------------------|---------------------------------------------------------------------|---------------------------|-------------------------------------------------------|---------------------|----------------------------------------------|-------------------------------|
| 5   | Stewart and Pertusa (2004) | English /Spanish             | B (Intermediate)  | Not Reported                                                        | Quantitative experimental | Researcher-designed test; Pretest; Immediate posttest | Movie               | Intralingual Subtitle; Interlingual Subtitle | Receptive Meaning             |
| 6   | Harji et al. (2010)        | Iranian /English             | C (Advanced)      | Input Hypothesis (Krashen, 1985); Dual Coding Theory (Paivio, 1971) | Quantitative experimental | Standardized test*; Delayed posttest                  | Instructional Video | Intralingual Subtitle                        | Receptive Meaning             |
| 7   | Perego et al. (2010)       | Italian /Hungarian           | Not Reported      | Input Hypothesis (Krashen, 1985)                                    | Quantitative experimental | Researcher-designed test; Immediate posttest          | Movie               | Interlingual Standard Subtitle               | Receptive Form                |
| 8   | Winke et al. (2010)        | Mainly English (99.3%)/Mixed | Not Reported      | Not Reported                                                        | Quantitative experimental | Researcher-designed test; Immediate posttest          | Documentary         | Intralingual Subtitle                        | Productive Meaning            |

| No. | Study                   | L1/L2                 | Proficiency Level | Theoretical Framework                                                                    | Methodology               | Measures                                              | Input Medium        | Input Mode                                                                            | Assessed Vocabulary Knowledge      |
|-----|-------------------------|-----------------------|-------------------|------------------------------------------------------------------------------------------|---------------------------|-------------------------------------------------------|---------------------|---------------------------------------------------------------------------------------|------------------------------------|
| 9   | Bisson et al. (2011)    | English / Dutch       | A (Beginner) *    | Not Reported                                                                             | Quantitative experimental | Researcher-designed test; Immediate posttest          | Movie               | Intralingual Subtitle; Interlingual Standard Subtitle; Interlingual Reversed Subtitle | Receptive Form                     |
| 10  | Lwo and Lin (2012)      | Chinese /English      | Mixed             | Dual Coding Theory (Paivio, 1971);Generative Theory of Multimedia Learning (Mayer, 2001) | Quantitative experimental | Researcher-designed test; Immediate posttest          | Flash Animation     | Interlingual Standard Subtitle; Intralingual Subtitle; Bilingual Subtitle             | Receptive Meaning; Receptive Use   |
| 11  | Čepon (2013)            | Slovenian /English    | B (Intermediate)  | Not Reported                                                                             | Quantitative experimental | Researcher-designed test; Pretest; Immediate posttest | Movie               | Interlingual Reversed Subtitle                                                        | Receptive Form;                    |
| 12  | BavaHarji et al. (2014) | Not Reported /English | B (Intermediate)  | Multiple-channel theory (Hsia, 1971); Dual Coding theory                                 | Quantitative experimental | Mixed test; Pretest; Immediate posttest               | Instructional Video | Intralingual Caption                                                                  | Productive Meaning; Productive Use |

---

(Paivio, 1971)

---

| No. | Study                                  | L1/L2                 | Proficiency Level | Theoretical Framework | Methodology               | Measures                                              | Input Medium | Input Mode                                                                                  | Assessed Vocabulary Knowledge                         |
|-----|----------------------------------------|-----------------------|-------------------|-----------------------|---------------------------|-------------------------------------------------------|--------------|---------------------------------------------------------------------------------------------|-------------------------------------------------------|
| 13  | Ina (2014)                             | Greek /Italian        | Not Reported      | Not Reported          | Quantitative experimental | Researcher-designed test; Immediate posttest          | Animation    | Intralingual Subtitle                                                                       | Receptive Meaning; Receptive Form                     |
| 14  | Perez et al. (2014)                    | Dutch /French         | B (Intermediate)  | Not Reported          | Quantitative experimental | Researcher-designed test; Pretest; Immediate posttest | News Clip    | Intralingual Caption: Full Caption; Keyword Caption; Full caption with highlighted keywords | Receptive Form; Receptive Meaning; Productive Meaning |
| 15  | Aidinlou (2016)                        | Not Reported /English | C (Advanced)      | Not Reported          | Quantitative experimental | Researcher-designed test; Mixed posttest              | TV series    | Intralingual Subtitle                                                                       | Not Reported#                                         |
| 16  | Birulés-Muntané and Soto-Faraco (2016) | Romance /English      | B (Intermediate)  | Not Reported          | Quantitative experimental | Researcher-designed test; Immediate posttest          | TV series    | Intralingual Subtitle; Interlingual Standard Subtitle                                       | Receptive Meaning                                     |

| No. | Study                | L1/L2                         | Proficiency Level | Theoretical Framework                                                                    | Methodology               | Measures                                              | Input Medium | Input Mode                                       | Assessed Vocabulary Knowledge                      |
|-----|----------------------|-------------------------------|-------------------|------------------------------------------------------------------------------------------|---------------------------|-------------------------------------------------------|--------------|--------------------------------------------------|----------------------------------------------------|
| 17  | Mohsen (2016)        | Arabic /English               | A (Beginner)      | Dual Coding Theory (Paivio, 1971); Cognitive Theory of Multimedia Learning (Mayer, 1997) | Quantitative experimental | Researcher-designed test; Pretest; Mixed posttest     | Animation    | Intralingual Glossed Caption; Glossed Transcript | Productive Form; Productive Meaning                |
| 18  | Peters et al. (2016) | Dutch /English                | Not Reported      | Not Reported                                                                             | Quantitative experimental | Researcher-designed test; Pretest; Immediate posttest | Documentary  | Intralingual Subtitle; Interlingual Subtitle     | Receptive Form; Productive Meaning                 |
|     |                      | Mainly Dutch (61.1%) /English |                   |                                                                                          |                           |                                                       | TV series    |                                                  | Receptive Form; Productive Form; Receptive Meaning |

| No. | Study                        | L1/L2             | Proficiency Level | Theoretical Framework                                                                    | Methodology               | Measures                                              | Input Medium | Input Mode                                                   | Assessed Vocabulary Knowledge                  |
|-----|------------------------------|-------------------|-------------------|------------------------------------------------------------------------------------------|---------------------------|-------------------------------------------------------|--------------|--------------------------------------------------------------|------------------------------------------------|
| 19  | Sirmandi and Sardareh (2016) | Iranian /English  | B (Intermediate)  | Dual Coding Theory (Paivio, 1971)                                                        | Quantitative experimental | Researcher-designed test; Immediate posttest          | News Clip    | Intralingual Subtitle                                        | Receptive Meaning                              |
| 20  | Ashcroft et al. (2018)       | Japanese /English | A (Beginner)      | Not Reported                                                                             | Quantitative experimental | Researcher-designed test; Pretest; Immediate posttest | Movie        | Intralingual Subtitle                                        | Productive Form; Receptive Meaning             |
| 21  | Chen et al. (2018)           | Chinese /English  | Mixed             | Dual Coding Theory (Paivio, 1971); Cognitive Theory of Multimedia Learning (Mayer, 1997) | Quantitative experimental | Researcher-designed test; Pretest; Delayed posttest   | Animation    | Intralingual Subtitle                                        | Receptive Form; Receptive Meaning              |
| 22  | Hsu (2018)                   | Chinese /English  | B (Intermediate)  | Dual Coding Theory (Paivio, 1971)                                                        | Quantitative experimental | Researcher-designed test; Pretest; Mixed posttest     | TV series    | Intralingual Subtitle; Intralingual Glossed Keyword Subtitle | Productive Form; productive Meaning; Receptive |

|     |                     |                  |                    |                                                                                                                      |                           |                                                       |               |                                                                                                  | Meaning                                               |
|-----|---------------------|------------------|--------------------|----------------------------------------------------------------------------------------------------------------------|---------------------------|-------------------------------------------------------|---------------|--------------------------------------------------------------------------------------------------|-------------------------------------------------------|
| No. | Study               | L1/L2            | Proficiency Level  | Theoretical Framework                                                                                                | Methodology               | Measures                                              | Input Medium  | Input Mode                                                                                       | Assessed Vocabulary Knowledge                         |
| 23  | Perez et al. (2018) | Dutch /French    | B (Intermediate)   | Not Reported                                                                                                         | Quantitative experimental | Researcher-designed test; Pretest; Immediate posttest | News Clip     | Intralingual Full Subtitle; Intralingual Keyword Subtitle; Intralingual Glossed Keyword Subtitle | Receptive Form; Receptive Meaning; Productive Meaning |
| 24  | Teng (2018)         | Chinese /English | B (Intermediate) * | Dual Coding Theory (Paivio,1971); Working Memory Model (Baddeley, 1986); Multimedia Principle (Fletcher&Tobia, 2005) | Quantitative experimental | Researcher-designed test; Immediate posttest          | Documentary * | Intralingual Full Caption; Intralingual Keyword Caption                                          | Receptive Form; Receptive Meaning; Productive Meaning |

| No. | Study                    | L1/L2                    | Proficiency Level | Theoretical Framework | Methodology               | Measures                                                       | Input Medium | Input Mode                                                                     | Assessed Vocabulary Knowledge                         |
|-----|--------------------------|--------------------------|-------------------|-----------------------|---------------------------|----------------------------------------------------------------|--------------|--------------------------------------------------------------------------------|-------------------------------------------------------|
| 25  | Fang et al. (2019)       | Chinese /English         | B (Intermediate)  | Not Reported          | Quantitative experimental | Researcher-designed test; Pretest; Immediate posttest posttest | Documentary  | Intralingual Subtitle; Bilingual Subtitle; Intralingual and Bilingual Subtitle | Receptive Form; Receptive Meaning; Productive Meaning |
| 26  | Peters (2019)            | Dutch /English           | B (Intermediate)  | Not Reported          | Quantitative experimental | Researcher-designed test; Pretest; Immediate posttest          | Documentary  | Intralingual Subtitle; Interlingual Standard Subtitle                          | Receptive Form; Productive Meaning                    |
| 27  | Perez (2019)             | Dutch /French            | B (Intermediate)  | Not Reported          | Quantitative experimental | Researcher-designed test; Immediate posttest                   | Documentary  | I Intralingual Subtitle                                                        | Receptive Form; Receptive Meaning                     |
| 28  | Pujadas and Muñoz (2019) | Catalan-Spanish /English | Mixed             | Not Reported          | Quantitative experimental | Researcher-designed test; Pretest; Immediate posttest          | TV series    | Intralingual Subtitle; Interlingual Subtitle                                   | Receptive Form; Productive Form; Productive Meaning   |



| No. | Study                  | L1/L2                    | Proficiency Level | Theoretical Framework                                                                   | Methodology               | Measures                                            | Input Medium    | Input Mode                                                       | Assessed Vocabulary Knowledge                                          |
|-----|------------------------|--------------------------|-------------------|-----------------------------------------------------------------------------------------|---------------------------|-----------------------------------------------------|-----------------|------------------------------------------------------------------|------------------------------------------------------------------------|
| 29  | Suárez and Gesa (2019) | Catalan Spanish /English | B (Intermediate)  | Not Reported                                                                            | Quantitative experimental | Researcher-designed test; Pretest; Delayed posttest | TV series       | Intralingual Subtitle                                            | Intralingual Subtitle                                                  |
| 30  | Teng (2019)            | Chinese/ English         | B (Intermediate)  | Dual Coding Theory (Paivio,1971); Generative Theory of Multimedia Learning (Mayer,2001) | Quantitative experimental | Researcher-designed test; Immediate posttest        | Flash Animation | Intralingual Full Caption; Intralingual Keyword Caption          | Receptive Form; Productive Form; Receptive Meaning; Productive Meaning |
| 31  | Wang (2019)            | Chinese /English         | Mixed             | Not Reported                                                                            | Quantitative experimental | Researcher-designed test; Immediate posttest        | TV series       | Intralingual Subtitle; Interlingual Subtitle; Bilingual Subtitle | Productive Meaning                                                     |
| 32  | Alharthi (2020)        | Arabic /English          | Mixed             | Not Reported                                                                            | Quantitative experimental | Researcher-designed test; Delayed                   | Movie           | Intralingual Subtitle                                            | Receptive Meaning; Productive                                          |

| posttest |                      |                  |                   |                       |                           |                                              |              |                                                       | Meaning                                               |
|----------|----------------------|------------------|-------------------|-----------------------|---------------------------|----------------------------------------------|--------------|-------------------------------------------------------|-------------------------------------------------------|
| No.      | Study                | L1/L2            | Proficiency Level | Theoretical Framework | Methodology               | Measures                                     | Input Medium | Input Mode                                            | Assessed Vocabulary Knowledge                         |
| 33       | Fievez et al. (2020) | Dutch /French    | B (Intermediate)  | Not Reported          | Quantitative experimental | Researcher-designed test; Immediate posttest | News Clip    | Intralingual Subtitle; Interlingual Standard Subtitle | Receptive Form; Productive Meaning; Receptive Meaning |
| 34       | Sinyashina (2020)    | Spanish /English | B (Intermediate)  | Not Reported          | Quantitative experimental | Researcher-designed test; Delayed posttest   | TV series    | Intralingual Subtitle                                 | Receptive Form; Receptive Meaning; Productive Use     |

*Note.* Information with the symbol "\*" represents the data was not provided in the paper but instead was provided by the paper's author

Information with the symbol "#" represents the data was not provided in the paper and could not be retrieved after attempting contact with the paper's author

## References (Primary Studies)

- Aidinlou, N. A. (2016). Short-term and long-term retention of vocabulary through authentic subtitled videos. *Advances in Language and Literary Studies*, 7(5), 14-22. <https://doi.org/10.7575/aiac.all.v7n.5p.14>
- Alharthi, T. (2020). Can adults learn vocabulary through watching subtitled movies? An experimental corpus-based approach. *International Journal of English Language and Literature Studies*, 9(3), 219-230. <https://doi.org/10.18488/journal.23.2020.93.219.230>
- Ashcroft, R. J., Garner, J., & Hadingham, O. (2018). Incidental vocabulary learning through watching movies. *Australian Journal of Applied Linguistics*, 1(3), 135-147. <https://doi.org/10.29140/ajal.v1n3.89>
- BavaHarji, M., Kamal Alavi, Z., & Letchumanan, K. (2014). Captioned instructional video: Effects on content comprehension, vocabulary acquisition and language proficiency. *English Language Teaching*, 7(5), 1-16. <https://doi.org/10.5539/elt.v7n5p1>
- Birules-Muntane, J., & Soto-Faraco, S. (2016). Watching subtitled films can Help learning foreign languages. *PLoS One*, 11(6), 1-10. <https://doi.org/10.1371/journal.pone.0158409>
- Bisson, M.-J., Van Heuven, W. J. B., Conklin, K., & Tunney, R. J. (2011). Processing of native and foreign language subtitles in films: An eye tracking study. *Applied Psycholinguistics*, 35(2), 399-418. <https://doi.org/10.1017/s0142716412000434>
- Čepon, S. (2013). Effective Use of the Media: Video in the Foreign Language Classroom. *Medijska Istraživanja: Znanstveno-stručni Časopis Za Novinarstvo I Medije*, 19(1), 83-104. <https://hrcak.srce.hr/105681>
- Chen, Y.-R., Liu, Y.-T., & Todd, A. G. (2018). Transient but effective? Captioning and adolescent EFL learners' spoken vocabulary acquisition. *English Teaching & Learning*, 42(1), 25-56. <https://doi.org/10.1007/s42321-018-0002-8>
- Danan, M. (1992). Reversed subtitling and dual coding theory: New directions for foreign-language instruction. *Language Learning*, 42(4), 497-527. <https://doi.org/10.1111/j.1467-1770.1992.tb01042.x>
- Fang, F., Zhang, Y., & Fang, Y. (2019). A comparative study of the effect of bilingual subtitles and English subtitles on college English teaching. *Revista de Cercetare si Interventie Sociala*, 66, 59-74. <https://doi.org/10.33788/rcis.66.4>
- Fievez, I., Perez, M. M., Cornillie, F., & Desmet, P. (2020). Vocabulary learning through viewing captioned or subtitled videos and the role of learner- and word-related factors. *CALICO Journal*, 37(3), 233-253. <https://doi.org/10.1558/cj.39370>
- Harji, M. B., Woods, P. C., & Alavi, Z. K. (2010). The effect of viewing subtitled videos on vocabulary learning. *Journal of College Teaching & Learning* 7(9), 37-42. <https://doi.org/10.19030/tlc.v7i9.146>
- Hsu, H.-T. (2018). Incidental professional vocabulary acquisition of EFL business learners effect of captioned video with glosses. *JALT CALL Journal*, 14(2), 119-142. <https://doi.org/10.29140/jaltcall.v14n2.227>
- Ina, L. (2014). Incidental foreign-language acquisition by children watching subtitled television programs. *The Turkish Online Journal of Educational Technology*, 13(4), 81-87. <http://www.tojet.net/articles/v13i4/1349.pdf>
- Koolstra, C. M., & Beentjes, J. W. J. (1999). Children's vocabulary acquisition in a foreign language through watching subtitled television programs at home. *Educational Technology Research and Development*, 47(1), 51-60. <https://doi.org/10.1007/bf02299476>
- Linebarger, D. L. (2001). Learning to read from television: The effect of using captions and narration. *Journal of Educational Psychology*, 93(2), 288-298. <https://doi.org/10.1037/0022-0663.93.2.288>
- Lwo, L., & Lin, M. C.-T. (2012). The effects of captions in teenagers' multimedia L2 learning. *ReCALL*, 24(2), 188-208. <https://doi.org/10.1017/s0958344012000067>
- Mohsen, M. A. (2016). Effects of help options in a multimedia listening environment on L2 vocabulary acquisition. *Computer Assisted Language Learning*, 29(7), 1220-1237. <https://doi.org/10.1080/09588221.2016.1210645>

- Neuman, S. B., & Koskinen, P. S. (1992). Captioned television as comprehensible input: Effects of incidental word learning from context for language minority students. *Reading Research Quarterly*, 27(1), 94-106. <https://www.jstor.org/stable/747835>
- Perego, E., Missier, F. D., Porta, M., & Mosconi, M. (2010). The cognitive effectiveness of subtitle processing. *Media Psychology*, 13(3), 243-272. <https://doi.org/10.1080/15213269.2010.502873>
- Perez, M. M. (2019). Pre-learning vocabulary before viewing captioned video: An eye-tracking study. *The Language Learning Journal*, 47(4), 460-478. <https://doi.org/10.1080/09571736.2019.1638623>
- Perez, M. M., Peters, E., Clarebout, G., & Desmet, P. (2014). Effects of captioning on video comprehension and incidental vocabulary learning. *Language Learning & Technology*, 18(1), 118-141. <https://doi.org/10.10125/44357>
- Perez, M. M., Peters, E., & Desmet, P. (2018). Vocabulary learning through viewing video: The effect of two enhancement techniques. *Computer Assisted Language Learning*, 31(1-2), 1-26. <https://doi.org/10.1080/09588221.2017.1375960>
- Peters, E. (2019). The effect of imagery and on-screen text on foreign language vocabulary learning from audiovisual input. *TESOL Quarterly*, 53(4), 1008-1032. <https://doi.org/10.1002/tesq.531>
- Peters, E., Heynen, E., & Puimège, E. (2016). Learning vocabulary through audiovisual input: The differential effect of L1 subtitles and captions. *System*, 63, 134-148. <https://doi.org/10.1016/j.system.2016.10.002>
- Sinyashina, E. (2020). Watching captioned authentic videos for incidental vocabulary learning: Is it effective? *Nordic Journal of English Studies*, 19(1), 28-64. <https://doi.org/10.35360/njes.539>
- Sirmandi, E. H., & Sardareh, S. A. (2016). The effect of BBC world clips with and without subtitles on intermediate EFL learners' vocabulary development. *Malaysian Online Journal of Educational Sciences*, 4(4), 61-69. <https://mojes.um.edu.my/index.php/MOJES/article/view/12674/8159>
- Stewart, M. A., & Pertusa, I. (2004). Gains to language learners from viewing target language closed-captioned films. *Foreign Language Annals*, 37(3), 438-442. <https://doi.org/10.1111/j.1944-9720.2004.tb02701.x>
- Suárez, M. d. M., & Gesa, F. (2019). Learning vocabulary with the support of sustained exposure to captioned video: Do proficiency and aptitude make a difference? *The Language Learning Journal*, 47(4), 497-517. <https://doi.org/10.1080/09571736.2019.1617768>
- Teng, F. (2018). Incidental vocabulary learning for primary school students: The effects of L2 caption type and word exposure frequency. *The Australian Educational Researcher*, 46(1), 113-136. <https://doi.org/10.1007/s13384-018-0279-6>
- Teng, F. (2019). The effects of video caption types and advance organizers on incidental L2 collocation learning. *Computers & Education*, 142(1), 1-14. <https://doi.org/10.1016/j.compedu.2019.103655>
- Wang, Y.-C. (2012). Learning L2 vocabulary with American TV drama from the learner's perspective. *English Language Teaching*, 5(8), 217-225. <https://doi.org/10.5539/elt.v5n8p217>
- Wang, Y. (2019). Effects of L1/L2 captioned TV programs on students' vocabulary learning and comprehension. *CALICO Journal*, 36(3), 204-224. <https://doi.org/10.1558/cj.36268>
- Winke, P., Gass, S., & Sydorenko, T. (2010). The effects of captioning videos used for foreign language listening activities. *Language Learning & Technology*, 14(1), 65-86. <https://doi.org/10.125/44203>

## References (Theoretical Frameworks)

- Baddeley, A. D. (1986). *Working Memory*. Oxford University Press.
- Fletcher, J. D., & Tobias, S. (2005). The multimedia principle. In R. E. Mayer (Ed.), *The Cambridge handbook of multimedia learning* (pp. 117-133). Cambridge University Press.

<https://doi.org/10.1017/CBO9780511816819.008>

Hsia, J. (1971). The information capacity of modality and channel performance. *Audio Visual Communication Review*, 19(1), 51-75. <https://doi.org/http://dx.doi.org/10.1007/BF02768431>

Krashen, S. D. (1985). *The input hypothesis: Issues and implications*. Longman. <https://doi.org/10.2307/414800>

Mayer, R. (1997). Multimedia learning: Are we asking the right questions? *Educational Psychologist*, 32(1), 1-19. [https://doi.org/10.1207/s15326985ep3201\\_1](https://doi.org/10.1207/s15326985ep3201_1)

Mayer, R. E. (2001). *Multimedia Learning*. Cambridge University Press. <https://doi.org/10.1017/CBO9781139164603>

Paivio, A. (1979). *Imagery and Verbal Processes*. Psychology Press. <https://doi.org/https://doi.org/10.4324/9781315798868>
