# Supplementary material
Source: MDPI journal article supplement (https://www.mdpi.com/2079-8954/10/5/133)
Supplement: s1 [file s1]

Archive with 1 entries (1 files):
- systems-1869874-supplementary.pdf
